# Supplementary material for: Tucum-do-Cerrado (Bactris setosa Mart.) May Promote Anti-Aging Effect by Upregulating SIRT1-Nrf2 Pathway and Attenuating Oxidative Stress and Inflammation
Source: PubMed Central journal article supplement (PMC5707715; doi:10.3390/nu9111243), 2017-11-14
Supplement: nutrients-09-01243-s001.pdf [file nutrients-09-01243-s001.pdf]

**Supplementary Table 1.** Primer sequences used for Nfe2l2, Nqo1, Hmox1, Il1b, Tnfa, Smp30, Sirt1, Sirt3 and Actb real-time PCR assays.

| Gene          | Primers sequences (5'- 3')                                              | GenBank accession number |
|---------------|-------------------------------------------------------------------------|--------------------------|
| <b>Nfe2l2</b> | GAGACGGCCATGACTGAT (forward)<br>GTGAGGGGATCGATGAGTAA (reverse)          | NM_031789.2              |
| <b>Nqo1</b>   | CAGCGGCTCCATGTACT (forward)<br>GACCTGGAAGCCACAGAAG (reverse)            | NM_017000.3              |
| <b>Hmox1</b>  | ATCGTGCTCGCATGAAC (forward)<br>CAGCTCCTCAAACAGCTCAA (reverse)           | NM_012580                |
| <b>Il1b</b>   | CACCTCTCAAGCAGAGCACAG (forward)<br>GGGTTCCATGGTGAAGTCAAC (reverse)      | NW_047658                |
| <b>Tnfa</b>   | AAATGGGCTCCCTCTCATCAGTTC (forward)<br>GTCGTAGCAAACCACCAAGCAGA (reverse) | X66539                   |
| <b>Smp30</b>  | AGGCATCAAAGTGTCTGCTGTTT (forward)<br>GACTGTCTGAAGTGCCACTGAACT (reverse) | X69021                   |
| <b>Sirt1</b>  | CTGTTTCTGTGGGATACCTGACT (forward)<br>ATCGAACATGGCTTGAGGATCT (reverse)   | XM_003751934             |
| <b>Sirt3</b>  | CCCGCTGCCCTGTCTGT (forward)<br>CTCCCCAAAGAACAATGTCA (reverse)           | NM_001106313             |
| <b>Actb</b>   | GTCGTACCACTGGCATTGTG (forward)<br>CTCTCAGCTGTGGTGGTGAA (reverse)        | NM_031144                |

**Supplementary Table 2.** Dilutions and companies of primary antibodies used for protein immunoblotting.

| Protein        | Dilution | Code/Company                        |
|----------------|----------|-------------------------------------|
| SIRT1          | 1:1000   | #9475 / Cell Signaling Technology   |
| SIRT3          | 1:1000   | #5490 / Cell Signaling Technology   |
| Nrf2           | 1:200    | sc-13032 / Santa Cruz Biotechnology |
| $\beta$ -actin | 1:1000   | #49675 / Cell Signaling Technology  |
